# Supplementary material
Source: MDPI journal article supplement (https://www.mdpi.com/2075-163X/11/12/1378)
Supplement: s1 [file s1]

Supplementary materials

## Characterization of Fibrous Wollastonite NYAD G in View of Its Use as Negative Standard for *In Vitro* Toxicity Tests

Dario Di Giuseppe, Valentina Scognamiglio, Daniele Malferrari, Luca Nodari, Luca Pasquali, Magdalena Lassinantti Gualtieri, Sonia Scarfi, Serena Mirata, Umberto Tessari, Miriam Hanuskova and Alessandro F. Gualtieri

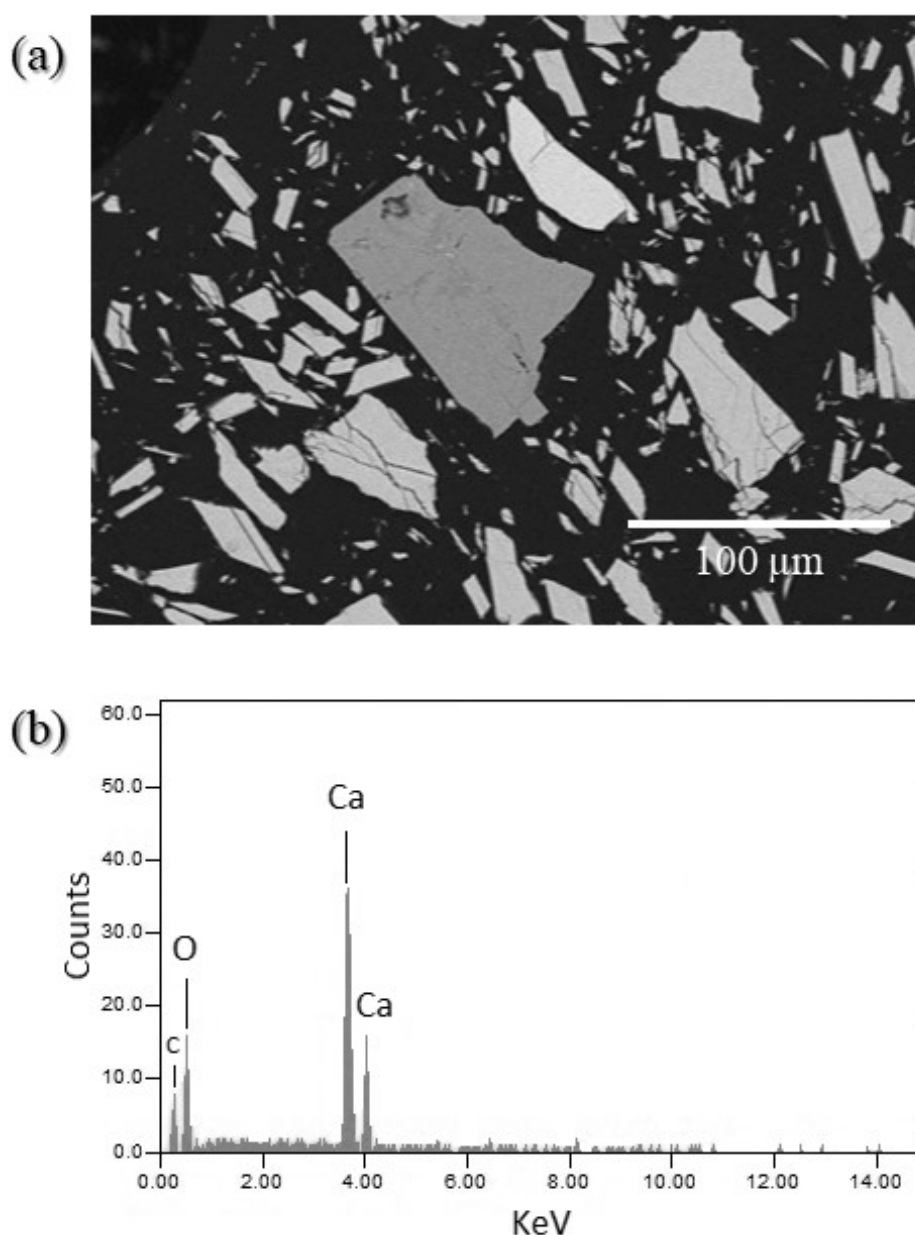

**Figure S1.** (a) Representative SEM image of a calcite crystal (highlighted by the red star) found in the sample. Image obtained by the backscattered electron detector. (b) EDX spectrum of calcite crystal shown in (a).

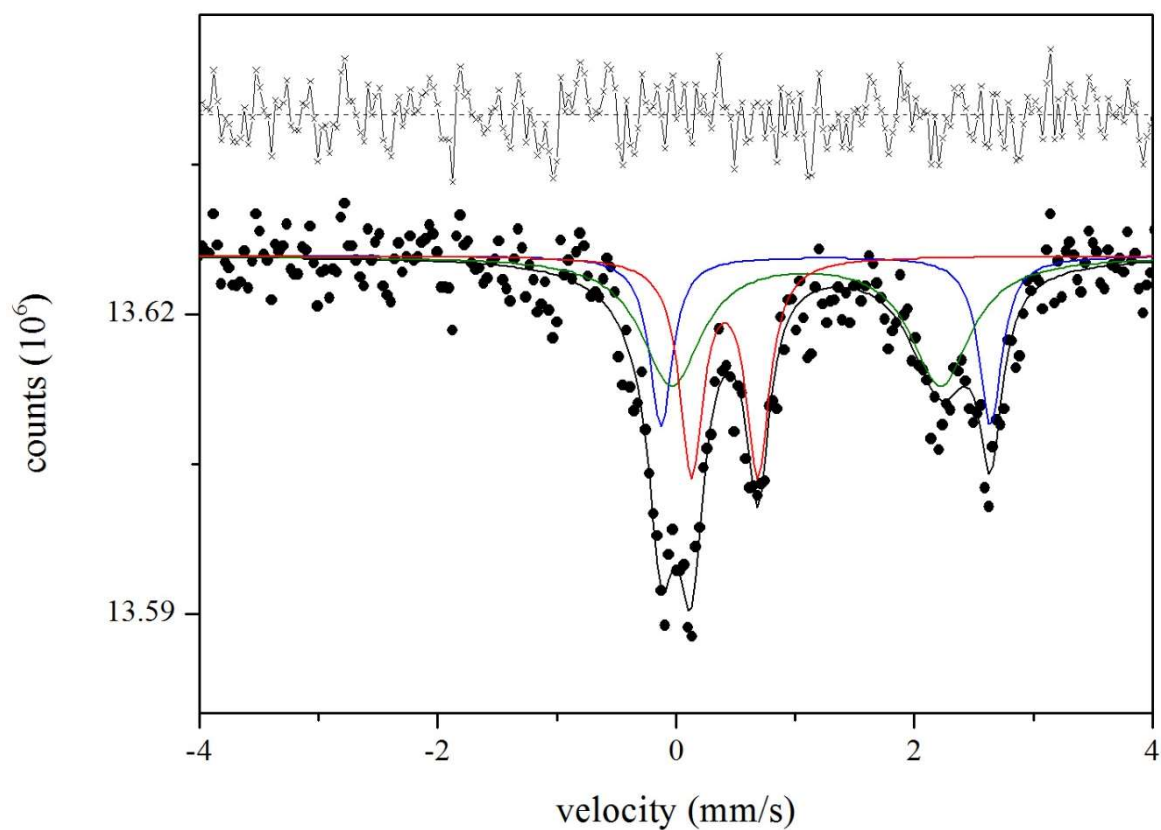

**Figure S2.** Room temperature Mössbauer spectrum of wollastonite NYAD G. Red line stands for Db1, blue line for Db2 and green line for Db3.

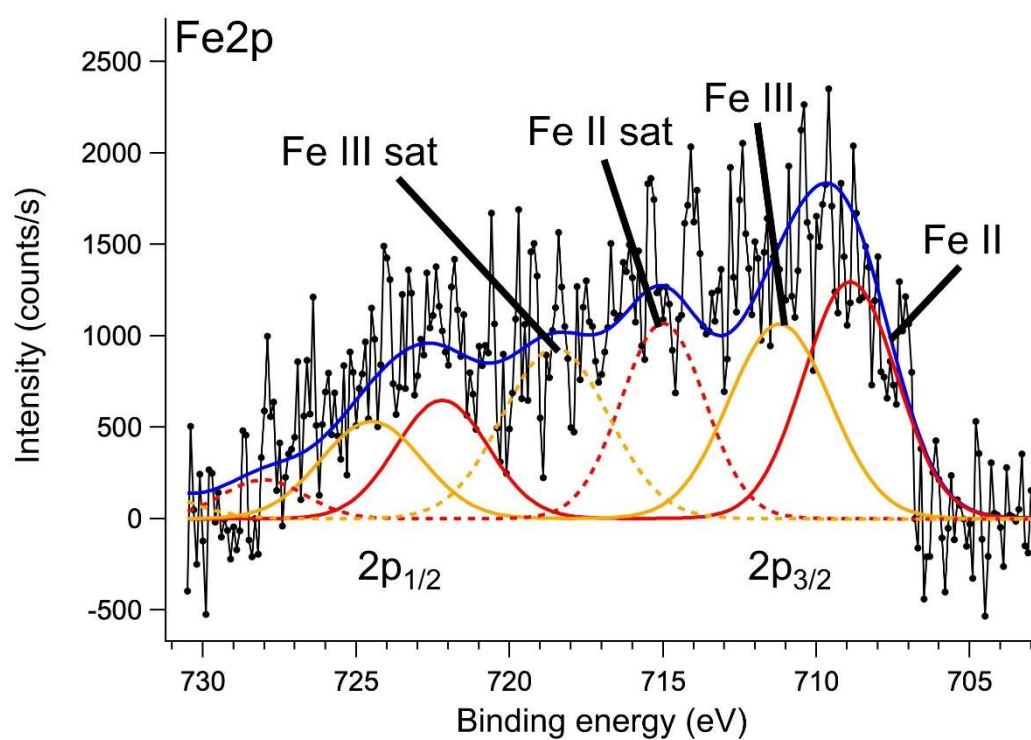

**Figure S3.** The Fe2p region of XPS spectra of wollastonite NYAD G.

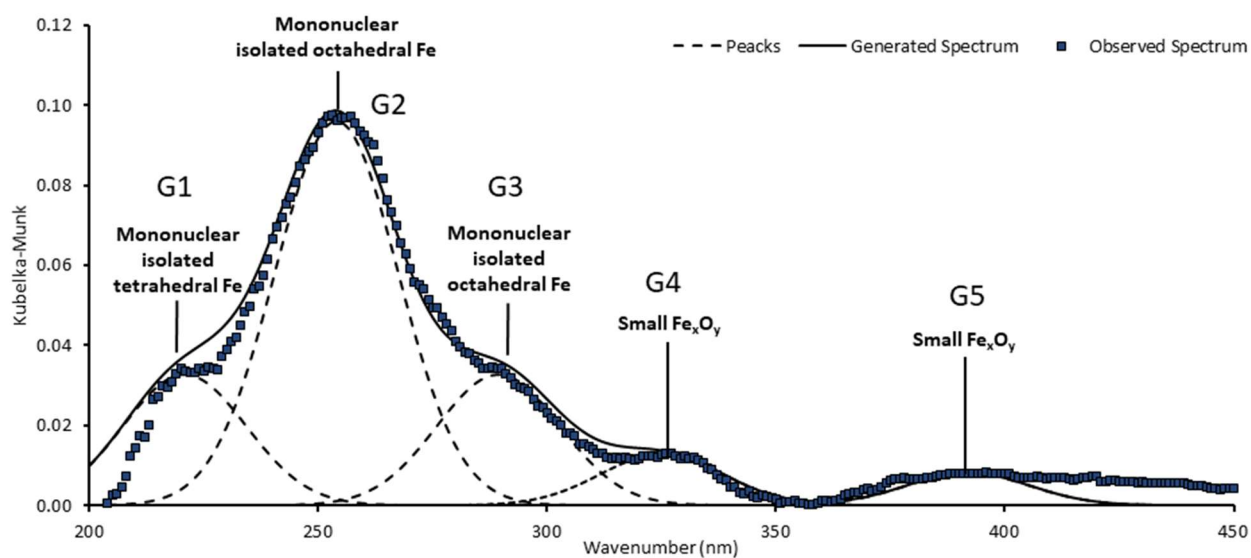

Figure S4. UV-Vis spectrum of wollastonite NYAD G

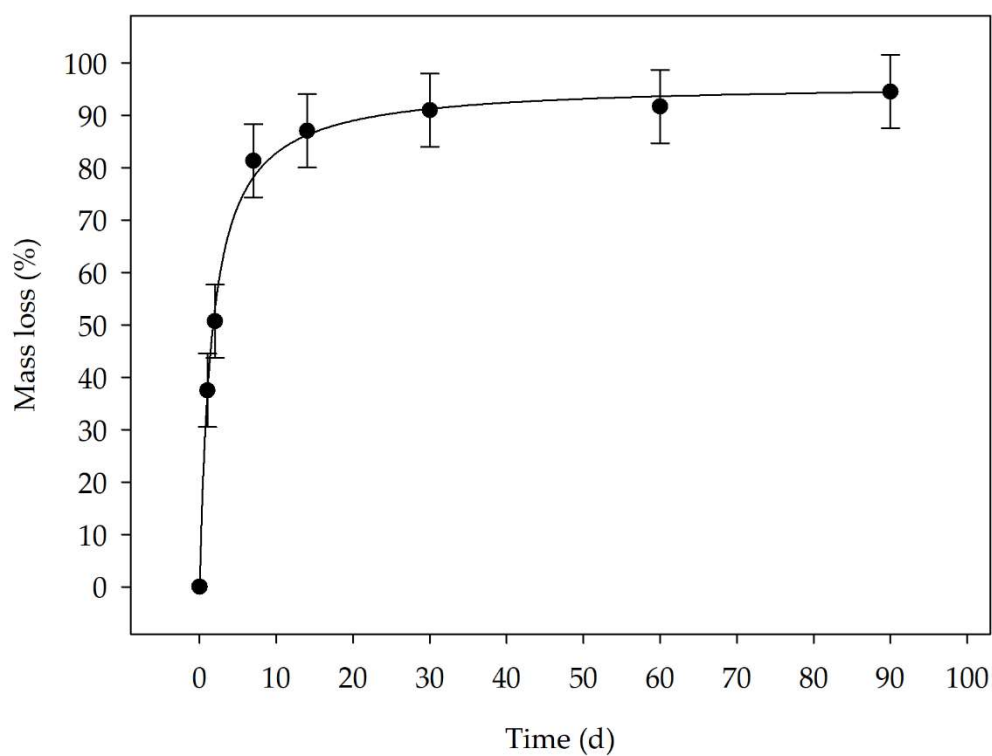

Figure S5. Dissolution curve of wollastonite NYAD G

**Table S1.** Results of EMPA analysis of wollastonite NYAD G

| Label | MnO  | MgO   | SiO <sub>2</sub> | FeO  | CaO   | Tot. | Label   | MnO  | MgO          | SiO <sub>2</sub> | FeO  | CaO   | Tot. |
|-------|------|-------|------------------|------|-------|------|---------|------|--------------|------------------|------|-------|------|
| W1    | 0.15 | n.d.  | 50.86            | 0.50 | 48.50 | 100  | W33     | 0.24 | 0.059        | 51.05            | 0.56 | 48.09 | 100  |
| W2    | 0.10 | 0.052 | 51.09            | 0.44 | 48.32 | 100  | W34     | 0.17 | 0.028        | 50.96            | 0.55 | 48.29 | 100  |
| W3    | 0.15 | 0.005 | 51.05            | 0.77 | 48.03 | 100  | W35     | 0.21 | 0.026        | 51.05            | 0.40 | 48.32 | 100  |
| W4    | 0.14 | n.d.  | 50.94            | 0.44 | 48.48 | 100  | W36     | 0.12 | <b>0.019</b> | 50.91            | 0.62 | 48.33 | 100  |
| W5    | 0.14 | 0.022 | 51.02            | 0.42 | 48.39 | 100  | W37     | 0.13 | 0.046        | 51.13            | 0.37 | 48.33 | 100  |
| W6    | 0.13 | 0.047 | 51.21            | 0.37 | 48.25 | 100  | W38     | 0.19 | 0.006        | 50.91            | 0.54 | 48.35 | 100  |
| W7    | 0.19 | 0.056 | 51.08            | 0.53 | 48.15 | 100  | W39     | 0.14 | n.d.         | 50.96            | 0.45 | 48.44 | 100  |
| W8    | 0.09 | 0.001 | 51.16            | 0.43 | 48.31 | 100  | W40     | 0.16 | n.d.         | 50.99            | 0.43 | 48.42 | 100  |
| W9    | 0.16 | 0.027 | 50.99            | 0.42 | 48.41 | 100  | W41     | 0.07 | 0.025        | 50.95            | 0.35 | 48.61 | 100  |
| W10   | 0.13 | 0.045 | 51.30            | 0.48 | 48.04 | 100  | W42     | 0.13 | 0.004        | 50.81            | 0.41 | 48.65 | 100  |
| W11   | 0.10 | 0.004 | 50.69            | 0.41 | 48.80 | 100  | W43     | 0.16 | 0.020        | 50.97            | 0.36 | 48.48 | 100  |
| W12   | 0.15 | 0.068 | 50.98            | 0.61 | 48.20 | 100  | W44     | 0.12 | 0.057        | 50.79            | 0.59 | 48.44 | 100  |
| W13   | 0.20 | 0.026 | 50.87            | 0.52 | 48.38 | 100  | W45     | 0.17 | 0.002        | 50.90            | 0.55 | 48.38 | 100  |
| W14   | 0.16 | 0.044 | 51.48            | 0.51 | 47.81 | 100  | W46     | 0.14 | 0.060        | 50.60            | 0.36 | 48.84 | 100  |
| W15   | 0.15 | 0.043 | 50.87            | 0.46 | 48.47 | 100  | W47     | 0.20 | 0.036        | 50.88            | 0.49 | 48.40 | 100  |
| W16   | 0.15 | 0.045 | 50.85            | 0.59 | 48.37 | 100  | W48     | 0.14 | 0.049        | 50.81            | 0.53 | 48.47 | 100  |
| W17   | 0.21 | 0.080 | 50.84            | 0.58 | 48.29 | 100  | W49     | 0.14 | 0.008        | 50.86            | 0.47 | 48.53 | 100  |
| W18   | 0.15 | 0.054 | 50.85            | 0.47 | 48.48 | 100  | W50     | 0.22 | 0.025        | 50.96            | 0.37 | 48.42 | 100  |
| W19   | 0.17 | 0.037 | 50.88            | 0.40 | 48.52 | 100  | W51     | 0.16 | 0.045        | 50.68            | 0.54 | 48.58 | 100  |
| W20   | 0.13 | 0.033 | 50.83            | 0.37 | 48.64 | 100  | W52     | 0.11 | 0.030        | 50.94            | 0.50 | 48.43 | 100  |
| W21   | 0.14 | 0.049 | 50.65            | 0.38 | 48.78 | 100  | W53     | 0.14 | 0.021        | 50.90            | 0.44 | 48.50 | 100  |
| W22   | 0.23 | 0.031 | 50.93            | 0.44 | 48.37 | 100  | W54     | 0.16 | 0.031        | 50.93            | 0.48 | 48.40 | 100  |
| W23   | 0.11 | 0.045 | 50.91            | 0.59 | 48.35 | 100  | W55     | 0.13 | 0.041        | 50.88            | 0.56 | 48.39 | 100  |
| W24   | 0.18 | 0.060 | 50.67            | 0.41 | 48.68 | 100  | W56     | 0.17 | 0.065        | 50.86            | 0.42 | 48.50 | 100  |
| W25   | 0.12 | 0.024 | 50.89            | 0.54 | 48.43 | 100  | W57     | 0.18 | 0.075        | 51.09            | 0.54 | 48.11 | 100  |
| W26   | 0.20 | 0.006 | 50.67            | 0.77 | 48.35 | 100  | W58     | 0.09 | 0.033        | 50.89            | 0.51 | 48.48 | 100  |
| W27   | 0.14 | 0.055 | 50.76            | 0.47 | 48.57 | 100  | W59     | 0.09 | 0.028        | 50.85            | 0.47 | 48.56 | 100  |
| W28   | 0.11 | 0.026 | 50.96            | 0.47 | 48.43 | 100  | W60     | 0.16 | 0.010        | 50.93            | 0.42 | 48.48 | 100  |
| W29   | 0.15 | n.d.  | 50.84            | 0.40 | 48.60 | 100  | W61     | 0.18 | 0.028        | 50.73            | 0.38 | 48.69 | 100  |
| W30   | 0.15 | 0.036 | 50.77            | 0.61 | 48.43 | 100  | W62     | 0.18 | 0.036        | 50.79            | 0.55 | 48.44 | 100  |
| W31   | 0.16 | 0.052 | 50.98            | 0.58 | 48.23 | 100  | W63     | 0.18 | 0.001        | 51.08            | 0.39 | 48.36 | 100  |
| W32   | 0.14 | n.d.  | 50.89            | 0.46 | 48.51 | 100  | Average | 0.15 | 0.03         | 50.92            | 0.48 | 48.42 | 100  |
